# Supplementary material for: Identification of hub biomarkers and immune cell infiltration in polymyositis and dermatomyositis
Source: publisher site journal article supplement (doi:10.18632/aging.204098), 2022-05-24
Supplement: Supplementary file [file aging-v14i10-204098-supplementary-material-SD2.pdf]

**SUPPLEMENTARY TABLE**

**Supplementary Table 1. The 82 DEGs identified by RRA method.**

| <b>Gene symbol</b> | <b>P value</b> | <b>Up/down regulated in DM/PM</b> |
|--------------------|----------------|-----------------------------------|
| ISG15              | 4.77E-08       | up                                |
| C1QB               | 7.73E-08       | up                                |
| HLA-A              | 9.33E-07       | up                                |
| HLA-C              | 1.53E-06       | up                                |
| HLA-B              | 2.15E-06       | up                                |
| PSMB8              | 7.57E-06       | up                                |
| C1QA               | 9.28E-06       | up                                |
| GBP1               | 1.05E-05       | up                                |
| UBE2L6             | 1.07E-05       | up                                |
| OR7E47P            | 2.15E-05       | down                              |
| PARP12             | 3.04E-05       | up                                |
| IRF9               | 3.38E-05       | up                                |
| LY96               | 5.85E-05       | up                                |
| NMI                | 9.99E-05       | up                                |
| IFIT3              | 1.69E-04       | up                                |
| SLC15A3            | 1.76E-04       | up                                |
| LGALS3BP           | 1.90E-04       | up                                |
| IFI35              | 2.12E-04       | up                                |
| IFITM3             | 2.27E-04       | up                                |
| IFI27              | 2.28E-04       | up                                |
| CHRNA1             | 2.63E-04       | up                                |
| SIGLEC1            | 2.63E-04       | up                                |
| TAP1               | 5.12E-04       | up                                |
| TIMP1              | 6.93E-04       | up                                |
| CXCL10             | 7.25E-04       | up                                |
| IFITM1             | 8.10E-04       | up                                |
| CDKN1A             | 8.63E-04       | up                                |
| VAMP8              | 0.001155721    | up                                |
| IFIT5              | 0.001253081    | up                                |
| PSMB9              | 0.001357084    | up                                |
| ZC3HAV1            | 0.001371369    | up                                |
| CD163              | 0.001371369    | up                                |
| HLA-J              | 0.00152631     | up                                |
| PRUNE2             | 0.001846685    | up                                |
| RARRES3            | 0.002123177    | up                                |
| VCAM1              | 0.002561986    | up                                |
| MYBPH              | 0.002561986    | up                                |
| SP100              | 0.003358794    | up                                |
| IFITM2             | 0.003358794    | up                                |
| IFI6               | 0.003424865    | up                                |
| AK055981           | 0.00382214     | down                              |
| LY6E               | 0.004165117    | up                                |
| IFI16              | 0.004177547    | up                                |
| C1R                | 0.004677307    | up                                |
| CCL2               | 0.005467811    | up                                |

|             |             |      |
|-------------|-------------|------|
| GBP2        | 0.006409146 | up   |
| HLA-F       | 0.007232014 | up   |
| TMSB10      | 0.007643577 | up   |
| HLA-G       | 0.00845383  | up   |
| STAT1       | 0.008518256 | up   |
| MN1         | 0.008826432 | down |
| VSIG4       | 0.009121644 | up   |
| CXCL9       | 0.00982952  | up   |
| IFI44L      | 0.010198991 | up   |
| PLSCR1      | 0.010662011 | up   |
| TYROBP      | 0.010970035 | up   |
| CCR1        | 0.011538863 | up   |
| PYCARD      | 0.011605535 | up   |
| C1S         | 0.014028206 | up   |
| PSME1       | 0.01403303  | up   |
| SAT1        | 0.015290515 | up   |
| MS4A4A      | 0.015378785 | up   |
| ATP2B2      | 0.016792652 | down |
| SP110       | 0.017703687 | up   |
| NIPSNAP3B   | 0.018377843 | down |
| OAS1        | 0.019487544 | up   |
| MX1         | 0.025685464 | up   |
| TRIM22      | 0.027970236 | up   |
| RHOBTB1     | 0.028239088 | down |
| TM6SF1      | 0.028442829 | down |
| OAS2        | 0.034005353 | up   |
| LAP3        | 0.034005353 | up   |
| MIF         | 0.034015527 | up   |
| CCL8        | 0.0361287   | up   |
| HERC5       | 0.040246026 | up   |
| PDP1        | 0.040568569 | down |
| LMO1        | 0.040568569 | down |
| KLF10       | 0.040568569 | down |
| NREP        | 0.043705414 | down |
| TFRC        | 0.044294258 | down |
| RSAD2       | 0.045653159 | up   |
| RP4-781L3.1 | 0.045787271 | up   |

---
